# Supplementary material
Source: PubMed Central journal article supplement (PMC7273327)
Supplement: mic-166-141-s001.pdf [file mic-166-141-s001.pdf]

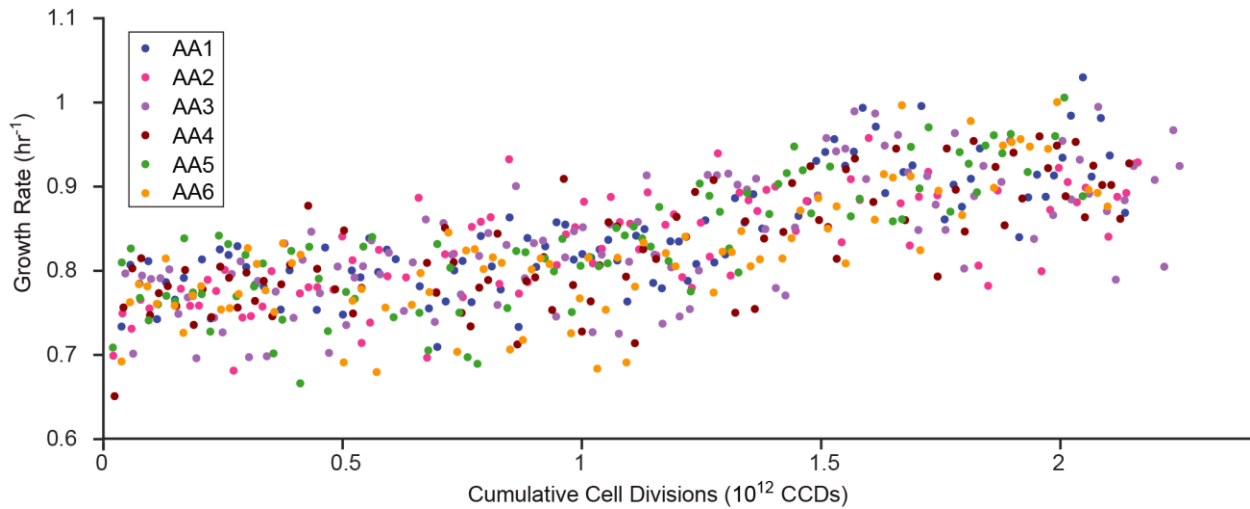

Figure S1. Raw data points for the evolution process of six acid-adapted (AA) strains.

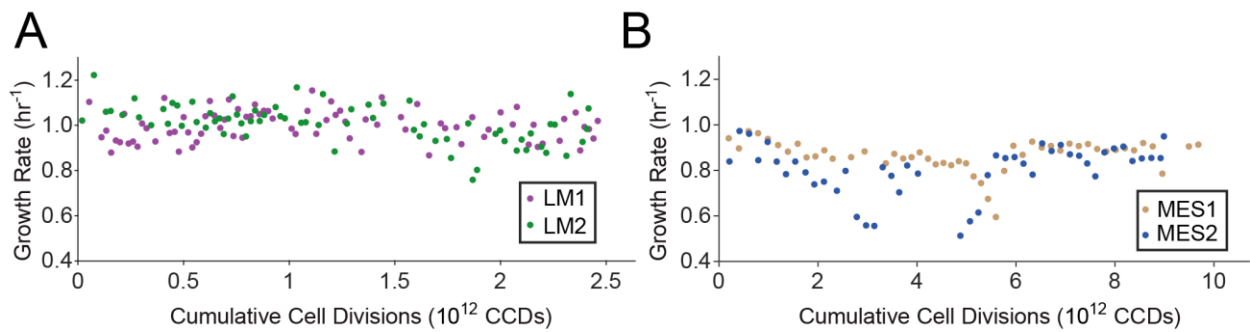

Figure S2. Growth rate versus cumulative cell divisions through the evolution process for control strains. (A) Control strains evolved in lowered magnesium concentration. (B) Control strains evolved in MES buffer.

Table S1. Periodic pH measurements of culture media over the course of evolution.

| Day               | 3    | 12                          | 25          | 27          | 35          |
|-------------------|------|-----------------------------|-------------|-------------|-------------|
| Condition         |      |                             |             |             |             |
| pH 5.5 MES start  | 5.55 | 5.45                        |             | 5.51        | 5.52        |
| pH 5.5 MES end    | 5.38 | 4.86 (0.26),<br>4.79 (0.39) |             | 5.14 (0.28) | 5.16 (0.37) |
| pH 7 MES start    | 7.00 | 7.04                        |             |             |             |
| pH 7 MES end      | 6.84 | 6.54 (0.39)                 | 6.55 (0.26) |             |             |
| pH 7 low Mg start | 7.07 | 7.10                        |             | 6.98        | 7.07        |
| pH 7 low Mg end   | 6.02 | 5.76 (0.35)                 | 4.98 (0.28) | 5.86 (0.37) | 5.40 (0.49) |

Aliquots were taken from both clean media (start) and those already used for cell culture (end). Days for sampling were chosen at random, and the used media were obtained from tubes containing cells ready for next passage. The OD600 measurements of the culture media are shown in parenthesis.

Table S2. All mutations identified in the clones of acid-evolved strains under pH 5.5.

| Gene             | Mutation | Protein change             | Flask number   | AA1 | AA2 | AA3 | AA4 | AA5 | AA6 |
|------------------|----------|----------------------------|----------------|-----|-----|-----|-----|-----|-----|
| <i>yejH</i>      | T→G      | D105E (GAT→GAG)            | 56             | X   |     |     |     |     |     |
| <i>rho</i>       | C→A      | R102S (CGC→AGC)            | 87             | X   |     |     |     |     |     |
| <i>tam</i>       | IS4      | coding (5-16/759 nt)       | <b>114</b>     | X   |     |     |     |     |     |
| <i>ilvL</i>      | Δ2 bp    | coding (33-34/99 nt)       | <b>114</b>     | X   |     |     |     |     |     |
| <i>rpoC</i>      | C→A      | A397E (GCG→GAG)            | <b>111</b>     |     | X   |     |     |     |     |
| <i>rpoC</i>      | G→C      | G444A (GGT→GCT)            | <b>88, 118</b> |     |     | X   |     |     |     |
| <i>yraJ</i>      | IS2      | coding (1893-1896/2517 nt) | 88             |     |     | X   |     |     |     |
| <i>yiaA</i>      | IS2      | coding (16-20/438 nt)      | <b>118</b>     |     |     | X   |     |     |     |
| <i>nagA</i>      | G→C      | S90* (TCA→TGA)             | 84             |     |     |     | X   |     |     |
| <i>ycjX</i>      | G→T      | G207G (GGG→GGT)            | 84             |     |     |     | X   |     |     |
| <i>rpoC</i>      | Δ7 bp    | coding (4106-4112/4224 nt) | <b>113</b>     |     |     |     | X   |     |     |
| <i>ilvL/ilvX</i> | T→G      | intergenic (+49/-38)       | 69             |     |     |     |     | X   |     |
| <i>yjcB</i>      | C→T      | R12H (CGC→CAC)             | 69             |     |     |     |     | X   |     |
| <i>rpoC</i>      | Δ1 bp    | coding (4111/4224 nt)      | <b>111</b>     |     |     |     |     | X   |     |
| <i>metF/katG</i> | C→T      | intergenic (+275/-54)      | <b>111</b>     |     |     |     |     | X   |     |
| <i>csgD/csgB</i> | T→C      | intergenic (-194/-561)     | <b>111</b>     |     |     |     |     | X   |     |

|                  |     |                        |                |  |  |  |  |  |   |
|------------------|-----|------------------------|----------------|--|--|--|--|--|---|
| <i>ydhY/ydhZ</i> | IS5 | intergenic (-215/+237) | 83, <b>111</b> |  |  |  |  |  | X |
| <i>nagA</i>      | C→T | R149H (CGT→CAT)        | 83             |  |  |  |  |  | X |
| <i>phoQ</i>      | G→C | P208R (CCG→CGG)        | 83             |  |  |  |  |  | X |
| <i>rho</i>       | C→T | R102C (CGC→TGC)        | <b>111</b>     |  |  |  |  |  | X |
| <i>rpoC</i>      | C→T | S539F (TCT→TTT)        | <b>111</b>     |  |  |  |  |  | X |
| <i>ycgJ</i>      | IS2 | coding (1-5/369 nt)    | <b>111</b>     |  |  |  |  |  | X |

Flask number stands for the number of cell passages during the evolution. The numbers in bold represent the final flask number (thus the endpoint) in the evolution process of the specific acid-evolved strain. The non-bold numbers are intermediate flasks during the evolution where samples were selected for whole genome sequencing.

Table S3. Mutations identified in the clones of control strains evolved under lowered magnesium concentration or in MES buffer

| Gene             | Mutation | Protein change            | Flask number  | LM1 | LM2 | MES1 | MES2 |
|------------------|----------|---------------------------|---------------|-----|-----|------|------|
| <i>oxyR</i>      | T→G      | C199G<br>(TGT→GGT)        | <b>122</b>    | X   |     |      |      |
| <i>dsbG/ahpC</i> | IS5      | intergenic (-<br>311/-58) | <b>122</b>    | X   |     |      |      |
| <i>oxyR</i>      | C→A      | A204E<br>(GCA→GAA)        | <b>109</b>    |     | X   |      |      |
| <i>alaC/ypdA</i> | C→A      | intergenic (-<br>281/-95) | <b>109</b>    |     | X   |      |      |
| <i>ilvL/ilvX</i> | T→G      | intergenic (+49/-<br>38)  | <b>53, 47</b> |     |     | X    | X    |
| <i>cbl</i>       | G→T      | Q225K<br>(CAG→AAG)        | <b>47</b>     |     |     |      | X    |
| <i>potG</i>      | C→T      | T107T<br>(ACC→ACT)        | <b>47</b>     |     |     |      | X    |
| <i>casA</i>      | C→T      | P60P<br>(CCG→CCA)         | <b>47</b>     |     |     |      | X    |

Table S4. Differentially expressed genes under acid stress for strain AA2

| Gene | Locus | log2FoldChange | Corrected p-value |
|------|-------|----------------|-------------------|
| exbD | b3005 | 7.19           | 7.36E-05          |
| feoA | b3408 | 6.57           | 4.55E-04          |
| ygaM | b2672 | 4.85           | 1.29E-14          |
| ftnA | b1905 | 4.29           | 4.28E-12          |
| zupT | b3040 | 4.17           | 3.43E-08          |
| dpiA | b0620 | 3.88           | 1.30E-12          |
| feoB | b3409 | 3.64           | 1.21E-13          |
| clcB | b1592 | 3.57           | 1.21E-05          |
| narG | b1224 | 3.56           | 6.19E-18          |
| narK | b1223 | 3.55           | 1.26E-07          |
| ynjF | b1758 | 3.45           | 4.55E-06          |
| gatZ | b2095 | 3.42           | 2.46E-08          |
| gatA | b2094 | 3.29           | 8.46E-04          |
| ycbC | b0920 | 3.25           | 4.92E-14          |
| focA | b0904 | 3.22           | 2.83E-11          |
| wrbA | b1004 | 3.19           | 5.69E-03          |
| hisD | b2020 | 2.90           | 1.14E-06          |
| frdB | b4153 | 2.89           | 2.65E-04          |
| pfkA | b3916 | 2.75           | 9.28E-07          |
| frdA | b4154 | 2.74           | 4.34E-10          |
| cueO | b0123 | 2.72           | 3.23E-08          |
| gpmM | b3612 | 2.68           | 5.88E-09          |
| sucC | b0728 | 2.68           | 8.55E-06          |
| yhbT | b3157 | 2.68           | 4.68E-03          |
| sucB | b0727 | 2.66           | 7.88E-07          |
| ycfP | b1108 | 2.61           | 5.60E-03          |
| sugE | b4148 | 2.59           | 3.48E-03          |
| hisC | b2021 | 2.58           | 5.03E-04          |
| gmk  | b3648 | 2.57           | 1.23E-04          |
| glnH | b0811 | 2.54           | 1.11E-05          |
| yhbQ | b3155 | 2.47           | 1.71E-09          |
| thrB | b0003 | 2.38           | 2.80E-05          |
| hfq  | b4172 | 2.35           | 7.44E-03          |
| exbB | b3006 | 2.34           | 2.66E-05          |
| copA | b0484 | 2.27           | 4.48E-11          |
| raiA | b2597 | 2.21           | 1.31E-04          |
| atpG | b3733 | 2.21           | 1.08E-04          |

|      |       |      |          |
|------|-------|------|----------|
| ftsZ | b0095 | 2.15 | 2.41E-04 |
| deaD | b3162 | 2.15 | 9.84E-09 |
| hisG | b2019 | 2.12 | 2.52E-04 |
| cyoE | b0428 | 2.11 | 4.70E-03 |
| cydB | b0734 | 2.09 | 1.22E-04 |
| sucD | b0729 | 2.07 | 3.44E-05 |
| udp  | b3831 | 2.06 | 3.30E-03 |
| yjhX | b4566 | 2.05 | 8.95E-03 |
| ybaQ | b0483 | 2.03 | 5.26E-05 |
| proB | b0242 | 2.01 | 2.83E-03 |
| ydgJ | b1624 | 1.99 | 5.83E-04 |
| yfbR | b2291 | 1.98 | 1.90E-04 |
| nirB | b3365 | 1.98 | 1.24E-06 |
| hisB | b2022 | 1.95 | 4.69E-03 |
| thrC | b0004 | 1.94 | 6.60E-04 |
| ycfD | b1128 | 1.94 | 8.34E-04 |
| manY | b1818 | 1.87 | 3.98E-05 |
| yieP | b3755 | 1.84 | 6.45E-03 |
| ddpF | b1483 | 1.83 | 1.54E-03 |
| hemG | b3850 | 1.83 | 2.31E-03 |
| cdh  | b3918 | 1.80 | 6.11E-04 |
| thrA | b0002 | 1.79 | 1.51E-05 |
| ppc  | b3956 | 1.78 | 6.63E-05 |
| yciU | b1248 | 1.77 | 3.38E-04 |
| ydgA | b1614 | 1.76 | 6.00E-03 |
| atpC | b3731 | 1.69 | 6.66E-03 |
| dapB | b0031 | 1.69 | 9.19E-03 |
| yhfA | b3356 | 1.68 | 9.70E-04 |
| pgk  | b2926 | 1.66 | 3.07E-03 |
| rlmE | b3179 | 1.66 | 3.22E-03 |
| thiC | b3994 | 1.63 | 5.03E-04 |
| cysA | b2422 | 1.63 | 5.37E-03 |
| yhjX | b3547 | 1.61 | 6.12E-04 |
| fhuA | b0150 | 1.61 | 6.16E-06 |
| asnA | b3744 | 1.61 | 7.09E-04 |
| manZ | b1819 | 1.60 | 3.92E-03 |
| gltB | b3212 | 1.57 | 1.19E-04 |
| cysH | b2762 | 1.56 | 7.71E-03 |
| dcuR | b4124 | 1.56 | 7.14E-04 |

|       |       |       |          |
|-------|-------|-------|----------|
| leuC  | b0072 | 1.54  | 2.20E-03 |
| nuoN  | b2276 | 1.53  | 5.98E-03 |
| bglJ  | b4366 | 1.48  | 3.07E-07 |
| crp   | b3357 | 1.44  | 7.93E-03 |
| brnQ  | b0401 | 1.44  | 9.36E-03 |
| pbpG  | b2134 | 1.44  | 8.46E-03 |
| glyS  | b3559 | 1.42  | 3.06E-03 |
| pykA  | b1854 | 1.41  | 8.87E-04 |
| yjjL  | b4356 | 1.41  | 1.16E-04 |
| gadA  | b3517 | 1.41  | 5.57E-03 |
| intZ  | b2442 | 1.40  | 6.83E-04 |
| nuoL  | b2278 | 1.38  | 8.98E-03 |
| codA  | b0337 | 1.36  | 8.15E-03 |
| infB  | b3168 | 1.36  | 3.54E-03 |
| rhtC  | b3823 | 1.35  | 1.40E-04 |
| gshA  | b2688 | 1.33  | 5.38E-03 |
| slyB  | b1641 | 1.33  | 7.81E-03 |
| hypD  | b2729 | 1.31  | 6.89E-03 |
| gltD  | b3213 | 1.30  | 7.44E-03 |
| rhtB  | b3824 | 1.29  | 9.57E-04 |
| ydiU  | b1706 | 1.28  | 2.57E-03 |
| lpIT  | b2835 | 1.27  | 1.70E-03 |
| ybiP  | b0815 | 1.26  | 2.50E-04 |
| fxsA  | b4140 | 1.23  | 3.27E-03 |
| aceB  | b4014 | 1.22  | 4.83E-04 |
| ynfM  | b1596 | 1.21  | 2.39E-03 |
| insD1 | b3045 | 1.18  | 9.00E-03 |
| pck   | b3403 | 1.16  | 7.81E-03 |
| yidR  | b3689 | 1.15  | 5.90E-05 |
| mltD  | b0211 | 1.15  | 4.75E-03 |
| ackA  | b2296 | 1.14  | 3.13E-03 |
| rhIB  | b3780 | 1.12  | 3.20E-03 |
| pykF  | b1676 | 1.11  | 1.09E-03 |
| rpoN  | b3202 | 1.10  | 7.93E-03 |
| tpx   | b1324 | 1.00  | 6.39E-04 |
| ysaA  | b3573 | -1.01 | 5.40E-03 |
| yaD   | b3552 | -1.10 | 6.45E-03 |
| glnD  | b0167 | -1.12 | 2.41E-04 |
| yfcJ  | b2322 | -1.14 | 9.94E-03 |



|      |       |       |          |
|------|-------|-------|----------|
| gntU | b4476 | -1.14 | 6.90E-03 |
| araH | b4460 | -1.16 | 7.96E-03 |
| yafJ | b0223 | -1.20 | 1.19E-04 |
| eutR | b2437 | -1.21 | 3.73E-03 |
| yqil | b3048 | -1.25 | 9.00E-03 |
| yfeH | b2410 | -1.28 | 3.42E-03 |
| yfjD | b4461 | -1.29 | 3.73E-03 |
| rmf  | b0953 | -1.30 | 6.27E-03 |
| ydhB | b1659 | -1.30 | 2.05E-04 |
| galR | b2837 | -1.32 | 1.45E-05 |
| yhjG | b3524 | -1.32 | 6.15E-03 |
| sfsB | b3188 | -1.34 | 1.14E-03 |
| nadB | b2574 | -1.35 | 9.79E-04 |
| rhaR | b3906 | -1.37 | 8.95E-03 |
| trg  | b1421 | -1.38 | 7.44E-03 |
| hisI | b2026 | -1.39 | 2.08E-03 |
| trmL | b3606 | -1.39 | 2.32E-03 |
| rtcR | b3422 | -1.41 | 9.72E-04 |
| ebgA | b3076 | -1.47 | 2.31E-03 |
| yafC | b0208 | -1.49 | 1.48E-03 |
| djlB | b0646 | -1.53 | 9.19E-03 |
| yghB | b3009 | -1.54 | 1.31E-03 |
| yifB | b3765 | -1.55 | 2.06E-05 |
| modC | b0765 | -1.58 | 8.62E-03 |
| tatD | b4483 | -1.60 | 6.52E-05 |
| ybhR | b0792 | -1.65 | 8.74E-03 |
| yfcl | b2305 | -1.65 | 2.06E-05 |
| erfK | b1990 | -1.67 | 6.49E-03 |
| rimO | b0835 | -1.68 | 5.22E-03 |
| ybdD | b4512 | -1.69 | 3.21E-04 |
| slmA | b3641 | -1.71 | 1.30E-03 |
| ttdT | b3063 | -1.72 | 6.07E-06 |
| yadS | b0157 | -1.73 | 4.20E-03 |
| tqsA | b1601 | -1.73 | 3.74E-06 |
| ratB | b2618 | -1.74 | 5.04E-03 |
| yajR | b0427 | -1.74 | 2.35E-04 |
| purM | b2499 | -1.78 | 4.25E-03 |
| cbl  | b1987 | -1.80 | 1.43E-05 |
| marB | b1532 | -1.86 | 3.61E-03 |

|      |       |       |          |
|------|-------|-------|----------|
| xylG | b3567 | -1.87 | 1.13E-03 |
| ycgR | b1194 | -1.88 | 1.77E-06 |
| zraP | b4002 | -1.88 | 2.08E-03 |
| kbaY | b3137 | -1.91 | 9.80E-03 |
| apaH | b0049 | -1.94 | 8.61E-06 |
| ykiA | b0392 | -1.97 | 4.82E-03 |
| gntX | b3413 | -1.98 | 1.90E-03 |
| yicL | b3660 | -2.01 | 7.46E-05 |
| ybdM | b0601 | -2.04 | 2.69E-08 |
| glcA | b2975 | -2.06 | 1.57E-03 |
| ycgG | b1168 | -2.07 | 6.63E-04 |
| yhhL | b3466 | -2.09 | 4.78E-05 |
| insQ | b1432 | -2.10 | 6.14E-05 |
| abgR | b1339 | -2.15 | 4.14E-03 |
| yabl | b0065 | -2.15 | 3.83E-03 |
| appY | b0564 | -2.33 | 3.03E-03 |
| yjgR | b4263 | -2.38 | 4.27E-03 |
| allD | b0517 | -2.50 | 1.90E-03 |
| yhil | b3487 | -2.51 | 8.18E-03 |
| osmB | b1283 | -2.67 | 4.43E-03 |
| alsB | b4088 | -2.81 | 4.16E-03 |
| feaR | b1384 | -2.84 | 7.81E-03 |
| ybcF | b0521 | -2.88 | 1.39E-08 |
| phoE | b0241 | -2.89 | 5.16E-09 |
| ygjI | b3078 | -3.02 | 7.93E-03 |
| mglA | b2149 | -3.04 | 1.58E-07 |
| xylF | b3566 | -3.46 | 1.47E-03 |
| panM | b3459 | -3.98 | 8.05E-07 |
| yadN | b0141 | -4.32 | 3.51E-03 |

Table S5. Differentially expressed genes under acid stress for strain AA6

| Gene | Locus | log2FoldChange | Corrected p-value |
|------|-------|----------------|-------------------|
| nuoE | b2285 | 2.97           | 6.48E-03          |
| atpC | b3731 | 2.50           | 1.54E-04          |
| gatZ | b2095 | 2.30           | 2.57E-03          |
| cysN | b2751 | 2.25           | 1.12E-03          |
| fliY | b1920 | 2.16           | 4.55E-03          |
| dksA | b0145 | 2.13           | 9.41E-03          |
| atpG | b3733 | 2.11           | 4.30E-04          |
| rho  | b3783 | 2.09           | 4.38E-06          |
| sucC | b0728 | 2.08           | 7.15E-04          |
| hisJ | b2309 | 2.08           | 3.84E-03          |
| ydjN | b1729 | 2.00           | 1.16E-03          |
| nuoM | b2277 | 1.99           | 1.36E-03          |
| sucD | b0729 | 1.99           | 7.98E-05          |
| cysP | b2425 | 1.93           | 2.24E-03          |
| gltB | b3212 | 1.90           | 4.38E-06          |
| dauA | b1206 | 1.90           | 1.12E-03          |
| cysD | b2752 | 1.89           | 8.30E-03          |
| nuoN | b2276 | 1.84           | 7.55E-04          |
| fabF | b1095 | 1.78           | 4.66E-04          |
| rplS | b2606 | 1.74           | 8.38E-03          |
| cysI | b2763 | 1.74           | 2.02E-03          |
| tyrS | b1637 | 1.72           | 7.15E-03          |
| sucB | b0727 | 1.67           | 4.77E-03          |
| speA | b2938 | 1.66           | 1.20E-04          |
| nuoL | b2278 | 1.62           | 2.92E-03          |
| thrA | b0002 | 1.61           | 3.21E-04          |
| aspC | b0928 | 1.57           | 3.80E-03          |
| argG | b3172 | 1.52           | 4.30E-04          |
| argH | b3960 | 1.48           | 5.10E-03          |
| tsf  | b0170 | 1.46           | 4.77E-03          |
| infB | b3168 | 1.44           | 3.39E-03          |
| rnb  | b1286 | 1.42           | 6.22E-03          |
| argA | b2818 | 1.42           | 6.80E-03          |
| secD | b0408 | 1.36           | 5.10E-03          |
| gltD | b3213 | 1.34           | 7.87E-03          |
| ppc  | b3956 | 1.32           | 7.99E-03          |
| rpoD | b3067 | 1.27           | 1.11E-03          |

|      |       |       |          |
|------|-------|-------|----------|
| aceB | b4014 | 1.06  | 4.09E-03 |
| ydbH | b1381 | -1.70 | 3.01E-03 |
| malF | b4033 | -1.91 | 3.59E-03 |
